## MagC, magnetic collection of ultrathin sections for volumetric correlative light and electron microscopy

Templier, T.<sup>1,2,\*</sup>

<sup>1</sup> *Institute of Neuroinformatics, University of Zurich and ETH Zurich, Zurich, Switzerland*

<sup>2</sup> *(current) Interdisciplinary Center for Electron Microscopy (CIME), Ecole Polytechnique Fédérale de Lausanne, Lausanne, Switzerland*

**Abstract** | The non-destructive collection of ultrathin sections onto silicon wafers for post-embedding staining and volumetric correlative light and electron microscopy traditionally requires exquisite manual skills and is tedious and unreliable. In MagC introduced here, sample blocks are augmented with a magnetic resin enabling remote actuation and collection of hundreds of sections on wafer. MagC allowed the correlative visualization of neuroanatomical tracers within their ultrastructural volumetric electron microscopy context.

**Introduction** | The ultrathin physical ablation of sample blocks is a prerequisite for volumetric biological electron microscopy (EM). The destructive methods serial block face<sup>1</sup> and focused ion beam EM<sup>2</sup> enable serial access to the sample in its whole depth only very briefly and inside the vacuum chamber of a specialized scanning EM, prohibiting (re-)imaging of permanently destructed portions, liquid treatments such as heavy-metal poststaining or immunostaining<sup>3</sup>, fluorescent light microscopy (LM)<sup>4</sup>, and various nanoscale imaging techniques<sup>5</sup>.

The automated non-destructive tape-based ablation method ATUM<sup>6</sup>, that greatly benefited volumetric EM<sup>7</sup>, provides sections onto silicon wafers but with a low packing density (about 200 per 100 mm diameter wafer), through an intermediate tape, and after manual gluing onto

a wafer. Carbon-coated Kapton tape suffers from strong autofluorescence preventing fluorescence microscopy, from scratches impairing EM imaging<sup>8</sup>, and from the difficulty to be uniformly carbon-coated<sup>8</sup> (a necessary step to avoid charging during imaging). Recently introduced carbon-nanotube tapes<sup>8</sup> solve most of these issues, though they require a custom device for reel-to-reel plasma hydrophilization and manual grounding of all cut tape stripes with conductive tape on top.

The invention of MagC was motivated by the wish instead to collect sections directly onto silicon wafers for excellent fluorescent LM and EM imaging conditions without tape-related issues and at high packing density for convenient bulk staining procedures with liquids and uninterrupted imaging in automated LMs and EMs, including next-generation multibeam EM<sup>9</sup>. In MagC, a piece of resin containing superparamagnetic nanoparticles is glued onto a polymerized sample block so that all cut sections carry magnetic material. Remote magnetic actuation then allows the agglomeration of floating sections in the center of a large bath attached to a diamond knife until they are deposited onto an underlying silicon wafer. Finally, the order of the sections is retrieved computationally after section collection. Two volumetric correlative LM-EM data sets of connectomics-grade brain tissue are presented here.

---

\*thomas.templier2@gmail.com

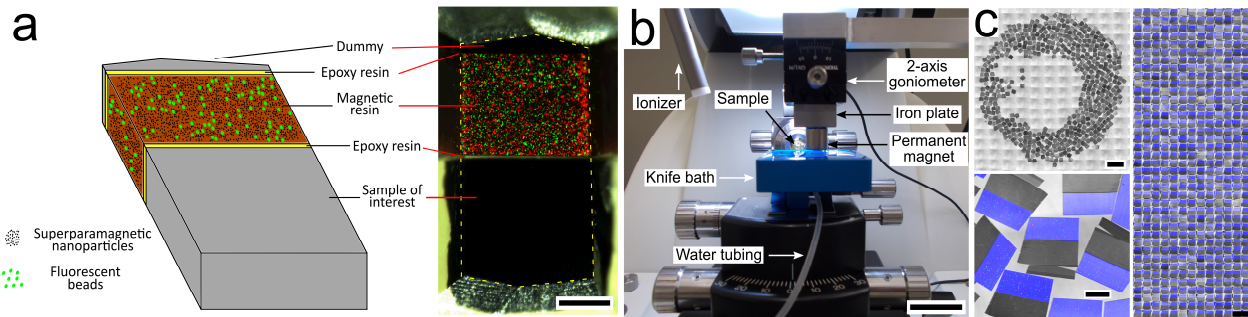

**Figure 1 | Magnetic augmentation and collection of sections on silicon wafer.** *a*, Augmentation of a polymerized sample block with resin containing superparamagnetic nanoparticles (for remote magnetic actuation) and fluorescent beads (for section order retrieval). *b*, Setup for MagC: a diamond knife with a large bath and a mobile overhanging magnet. *c*, 507 consecutive ultrathin sections collected on a silicon wafer: wafer overview, close-up (merge of whitefield and 3 fluorescent channels: blue-Coumarin, green, red-fluorescent beads) and montage of all sections. Scale bars: *a*-200  $\mu\text{m}$ , *b*-2 cm, *c*-2mm, 200  $\mu\text{m}$ , 1 mm

## Results and discussion

### 1. Magnetic resin

Magnetic epoxy-based resin containing 8% (w/w) iron oxide superparamagnetic nanoparticles<sup>10</sup> was produced for remote actuation. The resin also contained fluorescent polymer beads for post-collection section order retrieval, and a fluorescent dye to ease section segmentation (Fig. 1a, S2, S4). A piece of this resin was glued with an epoxy usually used for EM studies (durcupan) to a sample block of interest, with the help of a small mechanical device (Fig. S1) to maintain the blocks in position during curing in an oven. The resulting blocks were trimmed, and a second piece of resin (the “dummy”), consisting of a piece of heavy-metal stained and resin-embedded brain tissue, was glued to the magnetic resin to enhance cutting quality. The final block assembly was trimmed for ultrathin sectioning (Fig. 1a).

### 2. Sectioning

A custom diamond knife was built with an enlarged bath to let many hundreds of sections float at the water surface (Fig. 1b). A hole was drilled in the bottom to fill and empty the bath with a motorized syringe pump. A piece of silicon wafer was immersed in the bath and was slightly tilted compared to the water level (about 2 degrees) to avoid accumulation of water surface

dust in the center of the wafer at the end of the water withdrawal. After alignment of the knife and cutting a few sections, automatic sectioning was started and was left uninterrupted until the last section cut. A ionizer whose tip was placed close to the diamond knife created a very soft air current that gently detached sections from each other every few sections without impairing the cutting process. The sections floated freely at the water surface.

### 3. Magnetic collection

To collect the floating sections after the sectioning, a permanent magnet (cylindric, 15 mm diameter x 8 mm) was placed above the water surface with a 1 mm air gap (Fig. 1b). A few sections (about a dozen) that were slightly sticking to the walls of the bath were gently detached with an eyelash. The magnet, actuated by a robotic arm, scanned the water bath surface describing a snake path. At the end of the scan, the sections were accumulated in the center of the bath. Water was then withdrawn with a motorized syringe pump, while maintaining the 1 mm air gap by lowering the magnet with manual robotic control. Two small heating pads placed below the bath were turned on when the water level reached the level of the substrate.

The elevated wafer temperature generated by the heating pads (about 40 degrees) accelerated the evaporation of the water left at the wafer surface and avoided the formation of wrinkles in the deposited sections. The wafer was finally

placed on a hot plate at 50 degrees for 30 minutes. I report here on two collected wafers of 507 (data set 1, Fig. 1c) and 203 consecutive 50 nm thick sections (data set 2, Fig. S2).

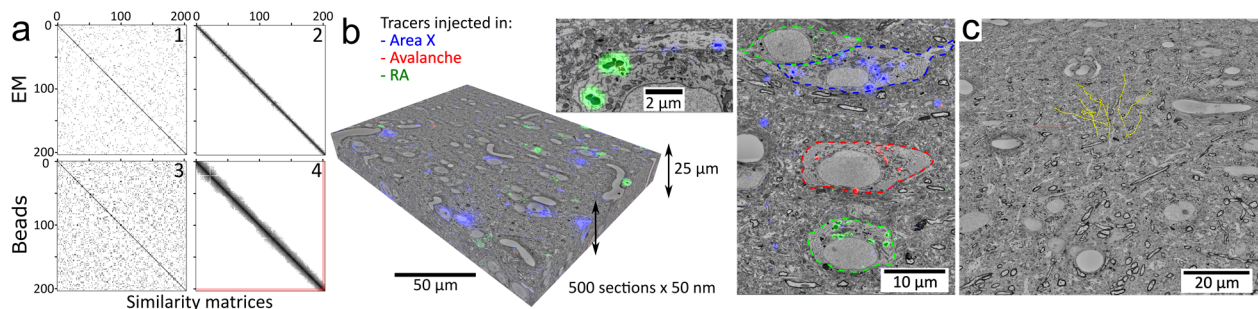

**Figure 2 Volumetric correlative LM-EM with MagC collected sections.** **a**, Section order retrieval on data set 2 (1% fluorescent beads) obtained with EM imagery (panels 1,2 show the pairwise similarity matrices before and after reordering, respectively) and with fluorescent beads imagery (panels 3,4). Darker pixels depict higher similarity and white pixels depict no similarity. The two red lines in panel 4 indicate a single flip in the computed order that was later corrected with EM imagery. **b**, Volumetric correlative stack of data set 1 with 3 fluorescent channels and 507 consecutive ultrathin sections. Insets: closeups of cell bodies and a neurite carrying different neuroanatomical tracers. The cell bodies in the right panel are outlined with colored dash lines. Blue: tracer injected in Area X. Green: tracer injected in RA. Red: tracer injected in Avalanche. **c**, The EM imagery was connectomics-grade and enabled neurite tracing. Yellow dots: skeletons stemming from 9 seed points placed in a 3x3 grid in the first section of data set 2.

#### 4. Order retrieval

The serial order was lost during the sectioning and had to be retrieved. After low-resolution (5x) reflection whitefield and fluorescent imaging of the wafers, the location and orientation of the sections was semi-automatically inferred. After calibration of 4 landmarks, medium resolution (20x) fluorescent imaging was automatically performed on the magnetic portion of each section. The cloud of fluorescent beads (2  $\mu\text{m}$  mean diameter) contained in the magnetic resin was revealed in this imagery. Since the section thickness (50 nm) was smaller than the diameter of the beads, each bead was visible in at least a dozen of consecutive sections, so that pairwise similarity of all sections could be computed. Solving a traveling salesman problem on the graph of pairwise similarities retrieved the serial order (as confirmed later manually with EM) with only a single error when using a high concentration of beads (1% w/w, Fig. 2a). A lower concentration yielded more errors (0.2% w/w, Fig. S3). With the

same methodology, the serial order could also be retrieved using the brain tissue EM imagery (Fig. 2a). Note that the order retrieval with fluorescent beads contained in the magnetic resin does not depend on the processed sample, which makes MagC suitable for collecting samples that for example would not show sufficient information for order retrieval by LM or EM.

#### 5. Imaging

The high packing density of the collected sections on wafer allowed convenient staining procedures (simply exchanging a few microliters of staining solution repetitively on an area smaller than 2 cm x 2 cm), and easy loading into LM and EM microscopes for uninterrupted automated imaging.

After immunostaining against neuroanatomical tracers previously injected into the brain of two zebra finches, multichannel fluorescent imaging (1 and 3 fluorescent channels in datasets 1 and 2, respectively, and 1 widefield channel) was automatically performed with custom scripts. Note that the small wafers were easily coverslipped with mounting medium underneath and oil on top to enable reflection LM with high magnification immersion objectives (63x). After washing off the mounting medium on the wafer followed by heavy metal poststaining, automated scanning EM was performed with custom scripts, acquiring the same portion of the section in each of them (supp. Video 2). Volumetric EM imagery was assembled (contrast enhancement, stitching, affine then elastic alignment) and the LM modality was registered to its EM counterpart (Fig. S7). The whole processing chain was entirely automated with custom scripts<sup>2</sup> operating in the Fiji/TrakEM2 environment<sup>11,12</sup>. Multibeam scanning EM was also used successfully to image magnetically collected sections (Fig. S5).

## 6. Data analysis

The experiments yielded correlative LM-EM stacks of brain tissue ready for connectomic analysis (Fig. 2b and supp. Video 1). For convenient use, the data were converted to the neuroglancer format and hosted online for seamless browsing and annotation with the web-based tool neuroglancer, also using

enhancements for multichannel overlay offered by neurodataviz (Fig. S8). To demonstrate the suitability of the data for connectomic analysis I traced 9 neurites with starting points located on a 3x3 grid within a central area of the first section, Fig. 2c. I also identified structures tagged with an injected neuroanatomical tracer such as an axon making an *en passant* synapse (Fig. S6).

**Conclusion** | In conclusion, MagC solves the challenge of collecting hundreds of serial ultrathin sections with a high packing density directly onto silicon wafers. I expect MagC to be used in high-throughput volumetric microscopy beyond connectomics for ultrastructural biology in general. Combined with broad ion beam milling<sup>13</sup> and next-generation multibeam EM, MagC could become an ideal platform for large-volume EM connectomics.

**Acknowledgements** | I thank N. Broguiere and H. Gnaeggi for comments on the manuscript and help in the design of the custom knife boat, respectively. I thank members of the Zeiss MultiSEM team (Eberle, Nickell, Garbowski) for the multibeam scanning EM experiments. I acknowledge support of the Scientific Center for Optical and Electron Microscopy ScopeM of the Swiss Federal Institute of Technology ETHZ.

**Competing interests** | A patent application has been filed.

---

<sup>2</sup> <https://github.com/templiert/MagC>

## 1 **Methods**

### 2 A. Animal experiments

3 Animal experiments were approved by the Veterinary office of Canton Zurich (207/2013). Two zebra  
4 finches were anesthetized with isoflurane and placed in a stereotaxic device. Fluorescent tracers were  
5 bilaterally injected (0.5-1  $\mu$ L) into different areas<sup>14</sup> as described in supp. Tables 1,2,3. Three to five days  
6 after tracer injection, the animals were sacrificed by perfusion fixation with fixative concentrations of  
7 2% formaldehyde and 2.5% glutaraldehyde in buffer with 0.1M cacodylate, 2mM calcium chloride  
8 (referred to as cacodylate buffer). The brain was extracted and slices of 150  $\mu$ m thickness were cut with  
9 a vibratome (Thermoscientific, #Microm HM650V) in cold cacodylate buffer. Portions of the slices  
10 containing the nucleus HVC were dissected out with a surgical scalpel and processed similarly as in the  
11 protocols described by Deerinck et al.<sup>15</sup> and Tapia et al.<sup>16</sup>. The sections were washed with cacodylate  
12 buffer, stained with heavy metals (2% osmium tetroxide reduced with 1.5% potassium ferrocyanide,  
13 washed, 1% thiocarbohydrazide, washed, 2% osmium tetroxide, washed, 1% uranyl acetate at 4C  
14 overnight, washed, 0.6% lead aspartate, washed), dehydrated with increasing ethanol concentrations  
15 (50%, 70%, 80%, 90%, 95%, 100%, 100%), infiltrated in epoxy Durcupan resin (10g component A/M, 10g  
16 B, 0.3g C, 0.2g D), and finally cured in an oven at 52 C for 48 hours.

### 17 B. Resin preparation

18 Magnetic resin was prepared as described by Puig et al.<sup>10</sup> with 8% weight concentration of iron oxide  
19 superparamagnetic nanoparticles (CAN Hamburg, Germany, #SMB-0-038) in epoxy resin (Diglycidylether  
20 of Bisphenol A, #D3415 Sigma Aldrich). In addition, fluorescent particles (Cospheric, mean diameter 2  
21  $\mu$ m, #FMG, #FMR, 0.2% and 1% weight concentration in data sets 1 and 2, respectively) and coumarin  
22 dye (SigmaAldrich, #257370, 7-Amino-4-methylcoumarin, 0.5% weight concentration) were added to the  
23 resin mixture prior to mixing. The resin mixture was poured between a glass slide (bottom) and a piece  
24 of aclar sheet (top), both coated with mould separating agent (#62407445, Glorex, [55]). A PDMS spacer  
25 of about 600  $\mu$ m thickness surrounded the resin and a small weight was put on top of the aclar sheet for  
26 flattening. The resin was cured for 6 hours at 70C.

### 27 C. Block augmentation

28 For block augmentation, a piece of magnetic resin and a dummy were successively glued to the sample  
29 of interest using the same Durcupan formulation as described above for brain tissue preparation. The  
30 execution details of the procedure are described in Fig. S1.

### 31 D. Section collection

32 The collection procedure is described in the main text. The custom diamond knife with a bath of  
33 dimensions 55 mm x 44 mm (now commercially available, #Ultra ATS, Diatome, Switzerland) was placed  
34 in an ultramicrotome (Leica, UC6). The water level in the bath was set with a motorized syringe pump  
35 (KDSscientific, #210). The setup shown in Fig. 1b consisted of a 3-axis motorized actuator (Thorlabs,  
36 #LTS150/M, #PT1/M-Z8) carrying an aluminum plate with a goniometer (Thorlabs, #GN2/M) screwed at  
37 its extremity, facing down. A cylindrical Neodymium magnet (Supermagnete, cylindrical, 15 mm diameter,  
38 8 mm height) was magnetically anchored to a steel plate screwed to the goniometer. The orientation of  
39 the magnet was adjusted with the goniometer in order to make its bottom surface parallel to the water  
40 level.

41 Silicon wafers (Ted Pella, #16015) were cleaved to approximately 40 mm x 45 cm chips, hydrophilized  
42 with oxygen plasma (1 min, 25 mA, Emitech #K100X) and placed in the knife bath with a ~2 degrees  
43 angle compared to water level thanks to asymmetrically stacked microscopy coverslips below the wafer  
44 chip.

#### 45 E. Postembedding stainings

46 The post-embedding immunostaining protocol is described in the Supplementary methods, paragraph G.  
47 Heavy metal post-staining was performed by exposing sections on wafer to a few drops of 2% aqueous  
48 uranyl acetate, then to a few drops of Reynold's lead citrate (lead 4.4% weight concentration), both for  
49 90 seconds. Between the two stains and after the second stain, the entire piece of wafer was immersed  
50 consecutively in 3 small petri dishes of double distilled water for 30 seconds each. After the second  
51 washing, the wafer was dried with a manual air blower.

#### 52 F. Section segmentation

53 The sections on wafer acquired with low resolution LM (5x air objective, Fig. 1c, S2) were segmented  
54 semi-automatically with help of the Trainable Weka Segmentation plugin<sup>17</sup> in Fiji/TrakEM2 and custom  
55 scripts.

#### 56 G. Section order retrieval with fluorescent beads

57 After preprocessing the fluorescent bead imagery ("Normalize local contrast" Fiji plugin, thresholding),  
58 the center location of the beads was extracted (Maxima Finder) for each fluorescent channel. The  
59 locations of the beads from the two fluorescent channels were merged into a single final channel. I  
60 computed a dissimilarity value for every pair of sections. For each pair of bead center sets, descriptor  
61 matching was performed (using descriptor-based bead alignment available in Fiji<sup>18</sup>). If no geometric  
62 match was found for a given pair of sections, then the dissimilarity value was set to a fixed large  
63 number. If a geometric match was found, then a matching affine transform was computed and applied  
64 to the first bead set, thus bringing the pair of bead sets into a same coordinate system. In this common  
65 coordinate system, the bead centers contained outside a central bounding box were excluded from  
66 further calculations to avoid considering beads that are present in one section but not in the other one  
67 due to a limited field of view and due to the different orientations of the section. The pair of remaining  
68 bead sets was then matched again with the descriptor-based tool. For each match, that is each pair of  
69 two matching beads, the absolute difference of the diameters of the matching beads was computed.  
70 The dissimilarity of two sections was then defined as the sum of these diameter differences across all  
71 matching beads. A traveling salesman problem was formulated using the dissimilarities as distances  
72 between nodes of a graph, and the problem was solved with the Concorde solver<sup>19</sup>.

#### 73 H. Section order retrieval with EM

74 An EM section was made of a mosaic of EM tiles (3x3 or 2x2). For a given pair of EM sections, a  
75 dissimilarity was computed for each pair of corresponding mosaic tiles and averaged across the tiles to  
76 yield the complete dissimilarity between two EM sections. The dissimilarity of two tiles was calculated as  
77 follows: an affine transform matching was sought between the pair of images, using the SIFT matching  
78 algorithms implemented in Fiji. If no affine transform was found, then the pair of tiles was given an  
79 arbitrary high dissimilarity. If a transform was found, then it was used to align the two tiles and a  
80 normalized cross-correlation was computed in a central box of 2000 x 2000 pixels. The value (2 –

81 correlation) was used as the dissimilarity value between the two tiles. When averaging the dissimilarities  
82 across tiles for a given pair of EM sections, the non-matching tiles were excluded if other tiles were  
83 matching. It made the dissimilarity value more robust to artefacts that may have prevented a match to  
84 be found in one of the tiles. As with the beads, an open traveling salesman problem was solved with the  
85 computed dissimilarities and yielded the original order, as confirmed with manual inspection of the EM  
86 stack.

#### 87 I. Imaging

88 Widefield fluorescent LM and scanning EM were performed with the characteristics detailed in Supp.  
89 Table 2. The LM and EM were controlled with python scripts through micromanager<sup>20</sup> and the Zeiss API,  
90 respectively. Autofocus was performed on each tile in LM (Nikon, #PerfectFocusSystem) and at the  
91 center of each EM mosaic.

#### 92 J. Data assembly

93 The brightfield channel of the LM imagery was used for the stitching, alignment and registration  
94 operations (with an initial “Normalize local contrast” from Fiji with blocks of about 100 pixel x 100 pixel)  
95 done in Fiji. The stitching was then propagated to all fluorescent channels. Stitching and alignment<sup>21</sup> of  
96 the EM imagery was done with custom scripts in TrakEM2.

97 For cross-modality registration, the stitched mosaics of the brightfield channel were preprocessed with  
98 local contrast enhancement and Gaussian blurring. The EM counterpart mosaics were downsampled to  
99 exhibit roughly the same pixel size as the LM imagery and further preprocessed with local contrast  
100 enhancement. The LM brightfield and EM imageries then exhibited a similar appearance so that  
101 corresponding SIFT features<sup>22</sup> could be computed across the two modalities (Fig. S7). Moving least  
102 squares transforms<sup>23</sup> were computed based on these matching SIFT features using Fiji. The transforms  
103 were then upsampled and applied to all fluorescent channels of the LM imagery in the TrakEM2 plugin  
104 to yield a volumetric correlative LM-EM stack.

105 For visualization purposes, the correlative LM-EM imagery was converted to the neuroglancer format  
106 and hosted online for convenient in-browser visualization and annotation. Details of the procedure in  
107 supp. Text 1 (paragraph N.). I plan to make data available in *neurodata.io*. The data sets 1 and 2 are  
108 currently available for review at . and ., respectively.

109

## 110 Bibliography

- 111 1. Denk, W. & Horstmann, H. Serial block-face scanning electron microscopy to reconstruct three-  
112 dimensional tissue nanostructure. *PLoS Biol.* **2**, e329 (2004).
- 113 2. Knott, G., Marchman, H., Wall, D. & Lich, B. Serial Section Scanning Electron Microscopy of Adult  
114 Brain Tissue Using Focused Ion Beam Milling. *J. Neurosci.* **28**, 2959–2964 (2008).
- 115 3. Micheva, K. D. & Smith, S. J. Array Tomography: A New Tool for Imaging the Molecular  
116 Architecture and Ultrastructure of Neural Circuits. *Neuron* **55**, 25–36 (2007).
- 117 4. Sigal, Y. M., Speer, C. M., Babcock, H. P. & Zhuang, X. Mapping Synaptic Input Fields of Neurons  
118 with Super-Resolution Imaging. *Cell* **163**, 493–505 (2015).
- 119 5. Pirozzi, N. M., Hoogenboom, J. P. & Giepmans, B. N. G. ColorEM: analytical electron microscopy  
120 for element-guided identification and imaging of the building blocks of life. *Histochemistry and*  
121 *Cell Biology* **150**, 509–520 (2018).
- 122 6. Kasthuri, N. *et al.* Saturated Reconstruction of a Volume of Neocortex. *Cell* **162**, 648–661 (2015).
- 123 7. Kornfeld, J. & Denk, W. Progress and remaining challenges in high-throughput volume electron  
124 microscopy. *Current Opinion in Neurobiology* (2018). doi:10.1016/j.conb.2018.04.030
- 125 8. Kubota, Y. *et al.* A carbon nanotube tape for serial-section electron microscopy of brain  
126 ultrastructure. *Nat. Commun.* (2018). doi:10.1038/s41467-017-02768-7
- 127 9. Eberle, A. L. & Zeidler, D. Multi-Beam Scanning Electron Microscopy for High-Throughput Imaging  
128 in Connectomics Research. *Front. Neuroanat.* **12**, 112 (2018).
- 129 10. Puig, J. *et al.* Superparamagnetic nanocomposites based on the dispersion of oleic acid-stabilized  
130 magnetite nanoparticles in a diglycidylether of bisphenol A-based epoxy matrix: Magnetic  
131 hyperthermia and shape memory. *J. Phys. Chem. C* **116**, 13421–13428 (2012).
- 132 11. Schindelin, J. *et al.* Fiji: an open-source platform for biological-image analysis. *Nat. Methods* **9**,  
133 676–82 (2012).
- 134 12. Cardona, A. *et al.* TrakEM2 software for neural circuit reconstruction. *PLoS One* **7**, e38011 (2012).
- 135 13. Templier, T. Technologies for Cellular-Resolution Connectomics. (ETH Zurich, 2018).  
136 doi:10.3929/ethz-b-000267370
- 137 14. Oberti, D., Kirschmann, M. A. & Hahnloser, R. H. R. Correlative microscopy of densely labeled  
138 projection neurons using neural tracers. *Front. Neuroanat.* **4**, 24 (2010).
- 139 15. Deerinck, T. J., Bushong, E. a., Thor, a. & Ellisman, M. H. NCMIR methods for 3D EM: A new  
140 protocol for preparation of biological specimens for serial block face scanning electron  
141 microscopy. *Microscopy* 6–8 (2010).
- 142 16. Tapia, J. C. *et al.* High-contrast en bloc staining of neuronal tissue for field emission scanning  
143 electron microscopy. *Nat. Protoc.* **7**, 193–206 (2012).
- 144 17. Arganda-Carreras, I. *et al.* Trainable\_Segmentation: Release v3.1.2. (2016).  
145 doi:10.5281/ZENODO.59290

146



- 147 18. Preibisch, S., Saalfeld, S., Rohlfing, T. & Tomancak, P. Bead-based mosaicing of single plane  
148 illumination microscopy images using geometric local descriptor matching. in *Proceedings of SPIE*  
149 (eds. Plum, J. P. W. & Dawant, B. M.) **7259**, 72592S–72592S–10 (International Society for Optics  
150 and Photonics, 2009).
- 151 19. Applegate, D., Bixby, R. E., Chvátal, V. & William J. Cook. Concorde TSP Solver. (2003).
- 152 20. Edelstein, A. D. *et al.* Advanced methods of microscope control using  $\mu$ Manager software. *J. Biol.*  
153 *Methods* **1**, 10 (2014).
- 154 21. Saalfeld, S., Fetter, R., Cardona, A. & Tomancak, P. Elastic volume reconstruction from series of  
155 ultra-thin microscopy sections. *Nat. Methods* **9**, 717–20 (2012).
- 156 22. Lowe, D. G. & G., D. Distinctive Image Features from Scale-Invariant Keypoints. *Int. J. Comput. Vis.*  
157 **60**, 91–110 (2004).
- 158 23. Schaefer, S., McPhail, T. & Warren, J. Image deformation using moving least squares. *ACM Trans.*  
159 *Graph.* **25**, 533 (2006).
- 160 24. Collman, F. *et al.* Mapping Synapses by Conjugate Light-Electron Array Tomography. *J. Neurosci.*  
161 **35**, 5792–5807 (2015).
- 162 25. Micheva, K. D., Busse, B., Weiler, N. C., O'Rourke, N. & Smith, S. J. Single-synapse analysis of a  
163 diverse synapse population: Proteomic imaging methods and markers. *Neuron* **68**, 639–653  
164 (2010).
- 165 26. Zheng, Z. *et al.* A Complete Electron Microscopy Volume of the Brain of Adult *Drosophila*  
166 *melanogaster*. *Cell* (2018). doi:10.1016/j.cell.2018.06.019

167

168

169

170 **Supplementary**

171

172 A. Stereotaxic injection coordinates ..... 11

173 B. Characteristics of the two datasets ..... 11

174 C. Block augmentation ..... 12

175 D. Wafer and section overview ..... 13

176 E. Metric for order retrieval and order retrieval for data set 1 ..... 13

177 F. EM of magnetic resin ..... 15

178 G. Immunostaining protocol ..... 15

179 H. Multibeam SEM..... 16

180 I. Labeled neurite ..... 17

181 J. Cross-modality registration..... 18

182 K. Video 1: flythrough in EM imagery of data set 2 ..... 19

183 L. Video 2: zoom on wafer of data set 2 ..... 19

184 M. Visualization of CLEM stack in neuroglancer ..... 19

185 N. Text 1: conversion of CLEM imagery for neuroglancer..... 19

186 O. Traced neurites ..... 20

187

188

189

190

191

192

193

194

195

196

197

198

199

200

201 A. Stereotaxic injection coordinates

202

|                                | RA   | AreaX | Avalanche |
|--------------------------------|------|-------|-----------|
| <b>Head angle (degrees)</b>    | 65   | 45    | 45        |
| <b>Pipette angle (degrees)</b> | 45   | -20   | 0         |
| <b>Anterior-Posterior (mm)</b> | 3    | 6.45* | 1.8       |
| <b>Media-Lateral (mm)</b>      | 2.45 | 1.55  | 2         |
| <b>Dorso-Ventral (mm)</b>      | 1.3  | 2.95  | 1.05      |

\*with a 0 degree pipette angle

203

204 *Table 1 Coordinates of adult male zebra finch nuclei targeted with tracer injections*

205 B. Characteristics of the two datasets

| Data set | Section number | Anatomical region | Tracer    | Injection site | Primary antibody | Secondary antibody | EM size (µm x µm) | EM Dwell time (ns) | Pixel size (nm) |
|----------|----------------|-------------------|-----------|----------------|------------------|--------------------|-------------------|--------------------|-----------------|
| 1        | 507            | HVC               | alexa 488 | RA             | rat α-488        | 488 α-rat          | 275 x 205         | 820                | 8               |
|          |                |                   | FITC      | Area X         | mouse α-FITC     | 647 α-mouse        |                   |                    |                 |
| 2        | 203            | Dorsal RA         | texas red | Avalanche      | goat α-rhodamine | 546 α-rhodamine    | 185 x 140         | 6000               | 8               |
|          |                |                   | BDA       | Caudal RA      | mouse α-BDA      | 647 α-mouse        |                   |                    |                 |

206

207 *Table 2 Characteristics of the two presented data sets*

208 The color coding of the fluorescent imagery in data set 1 is: Green - tracer injected in RA, Red-tracer  
209 injected in Avalanche, Blue-tracer injected in Area X.

| Antigen          | Alexa 488<br>LT #D-22910                                   | FITC<br>LT #D-1820                        | Texas Red<br>LT #D-3328   | BDA<br>LT #D-1956              |
|------------------|------------------------------------------------------------|-------------------------------------------|---------------------------|--------------------------------|
| Antibody species | <b>rabbit</b> (LT #A-11094)<br><b>rat</b> (Biotem #custom) | <b>mouse</b><br><b>rabbit</b> (LT #A-889) | <b>goat</b> (VL #SP-0602) | <b>mouse</b> (JI #200-002-211) |

210

211 *Table 3 Tracer-antibody library. LT: Life Technologies. VL: Vector Laboratories. JI: Jackson Immunoresearch.*

212

213

214

215

216

217

218

### C. Block augmentation

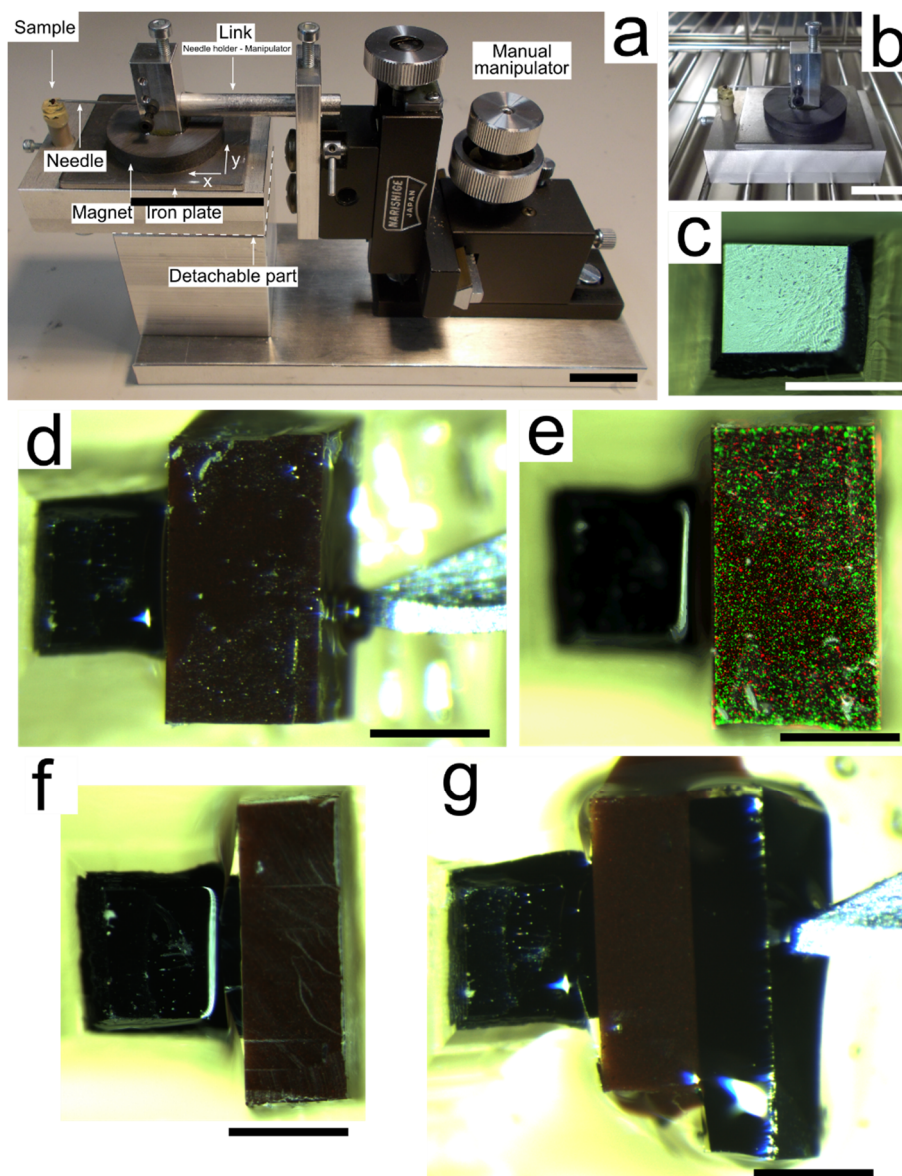

219

220 **Figure S1 Magnetic augmentation.** **a**, Mounting helper device. The manual manipulator allows the experimenter to precisely  
221 place the needle in contact with the block to be glued on the sample. The iron plate together with the base magnet of the  
222 needle holder maintain the position set by the manipulator. **b**, The detachable part is placed in an oven for temperature curing. **c**,  
223 The biological sample is trimmed manually with a razor blade. **d**, The magnetic resin is glued to the sample and maintained in place  
224 with a needle. **e**, Overlay of color and fluorescent imagery showing the fluorescent particles contained in the magnetic resin. **f**,  
225 The magnetic resin is manually trimmed down to achieve roughly a 50/50 ratio of sample surface to magnetic surface suitable  
226 for sectioning at 50 nm nominal thickness. **g**, An additional dummy piece of heavy metal-stained resin embedded brain tissue is  
227 glued to the block. **h** After final trimming, the block presents a pointed shape (overlayed with the yellow dashed line) and is ready  
228 for sectioning. Note: the stronger red signal at the bottom is not due to large particle aggregates but due to out-of-focus effects.  
229 Scale bars: **a, b**-20 mm; **c** to **g**: 500  $\mu$ m

230

231

232

233 D. Wafer and section overview

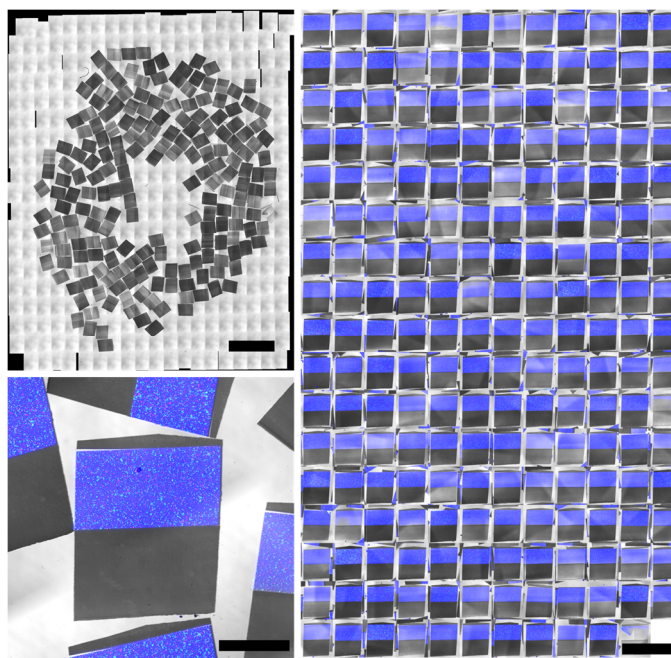

234

235 *Figure S2 Wafer overview of data set 2. Top left, widefield LM of the collected sections. Bottom left, close up around one*  
236 *section, merge multichannel fluorescent imagery: blue-Coumarin, green, red-fluorescent beads). Right, montage of all sections*  
237 *with the same orientation.*

238 E. Metric for order retrieval and order retrieval for data set 1

239 A metric was defined to assess the quality of the reordering process based on imagery of fluorescent  
240 beads. This metric requires the knowledge of the ground truth order, which I obtained from the SOR  
241 performed with EM imagery, and which I call the “EM order”.

242 For each section of a reordered dataset, a cost is given to the the link between the given section and the  
243 next one. The cost is equal to the difference of the indices of the sections in the ground truth order,  
244 minus one. For example, the links of the order 1-2-3-4-5-6-7-8 have the costs 0,0,0,0,0,0, so do the  
245 links of the 8-7-6-5-4-3-2-1 order, while the links of the order 1-2-4-5-3-8-6-7 have the costs  
246 0,1,0,1,4,1,0. A single flip such as 1-2-4-3-5-6 has the cost 0,1,0,1,0,0. The frequency of these costs gives  
247 an estimate of how precise the reordering is.

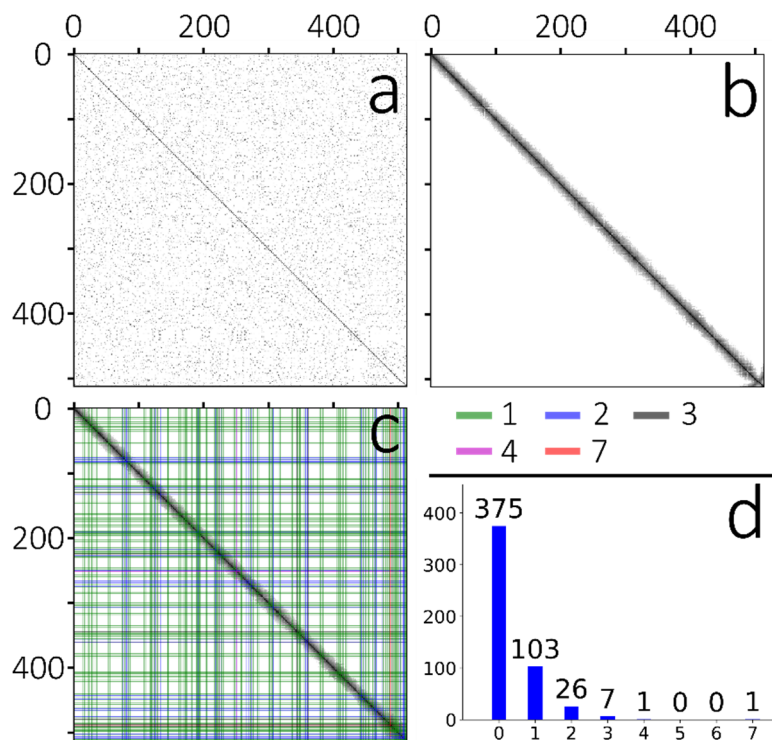

248

249 **Figure S3 Section order retrieval of data set 1 (low concentration of beads).** *a*, Matrix of pairwise similarities of unordered  
 250 sections computed with EM imagery. Darker pixels depict higher similarity and white pixels depict no similarity. *b*, Reordered EM  
 251 matrix. *c*, Matrix of pairwise similarities of unordered sections computed with fluorescent bead imagery. The original order is the  
 252 order provided by the section segmentation pipeline. *d*, Similarity matrix of the reordered sections. The order overall looks  
 253 consistent, except slight deviations at the end of the data set (around section number 500) that can be seen in the lower left of  
 254 the matrix. *e*, Similarity matrix with the EM order. The costs of the links of the bead order are overlaid as vertical and  
 255 horizontal bars of different colors. The green bars show the locations of the links that have a cost of 1, and there are 103 of  
 256 them. *f*, The distribution of costs of the links. The largest mistake is a link with cost 7 at the end of the data set.

257

258

259

260

261

262

263

264

265

266

267

268

269

## F. EM of magnetic resin

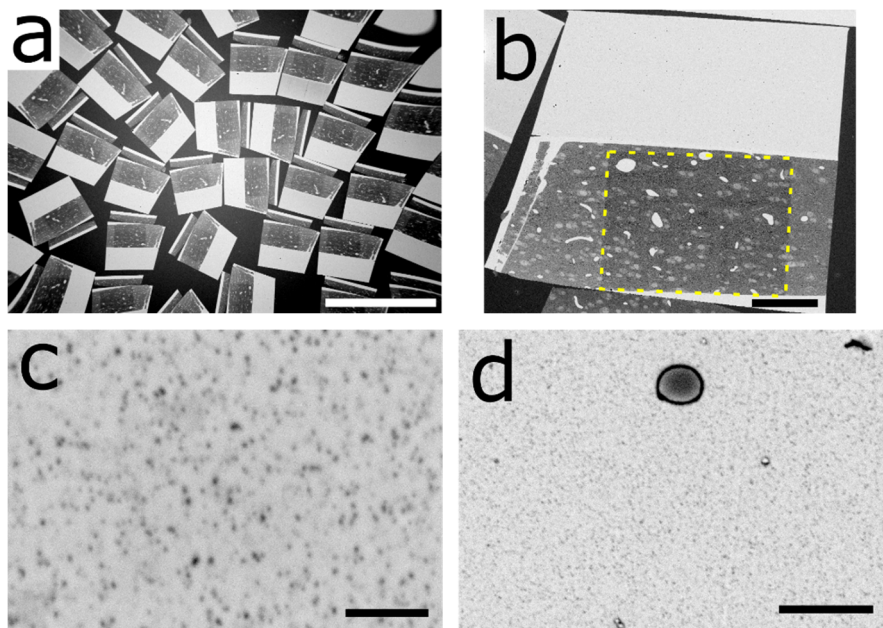

270

271 **Figure S4 Electron micrographs of the sections from data set 1.** *a*, Electron micrograph of numerous sections collected on  
272 wafer. *b*, EM of a section. The yellow dashed square highlights the region that has been imaged with the electron microscope  
273 and became darker due to the beam irradiation. *c*, EM of well-dispersed superparamagnetic nanoparticles in the appended  
274 resin. *d*, Small contaminations can sometimes be found in the fluomagnetic resin. Scale bars: *a*-1mm, *b*-100  $\mu\text{m}$ , *c*-500 nm, *d*-  
275 2 $\mu\text{m}$

276

## G. Immunostaining protocol

277 I deposited and exchanged staining solutions manually with graduated pipettes on the sections  
278 collected on flat substrate. All steps were performed at room temperature. The blocking solution was:  
279 1% Baurion BSA-c, 0.05% Tween<sup>24</sup> in TBS pH 7.4. The detailed procedure was:  
280 1.Blocking -- blocking solution -- 2x 10 min  
281 2.Primary antibody incubation -- 1:50 in blocking solution -- 1.5h  
282 3.Washing -- TBS -- 4x5min  
283 4.Secondary antibody -- 1:100 in blocking solution -- 1 h  
284 5.Washing -- TBS -- 2x5min  
285 6.Washing -- dH2O -- 2x5min  
286 7.Drying with hand dust blower (Bergeon #30540)  
287 8.Air drying -- 5 min  
288 Proceed to fluorescent imaging within the next hours to avoid decay of staining as reported by Micheva  
289 et al. <sup>25</sup>, Fig. Sup. S3.

290

291

292

293

294 H. Multibeam scanning EM

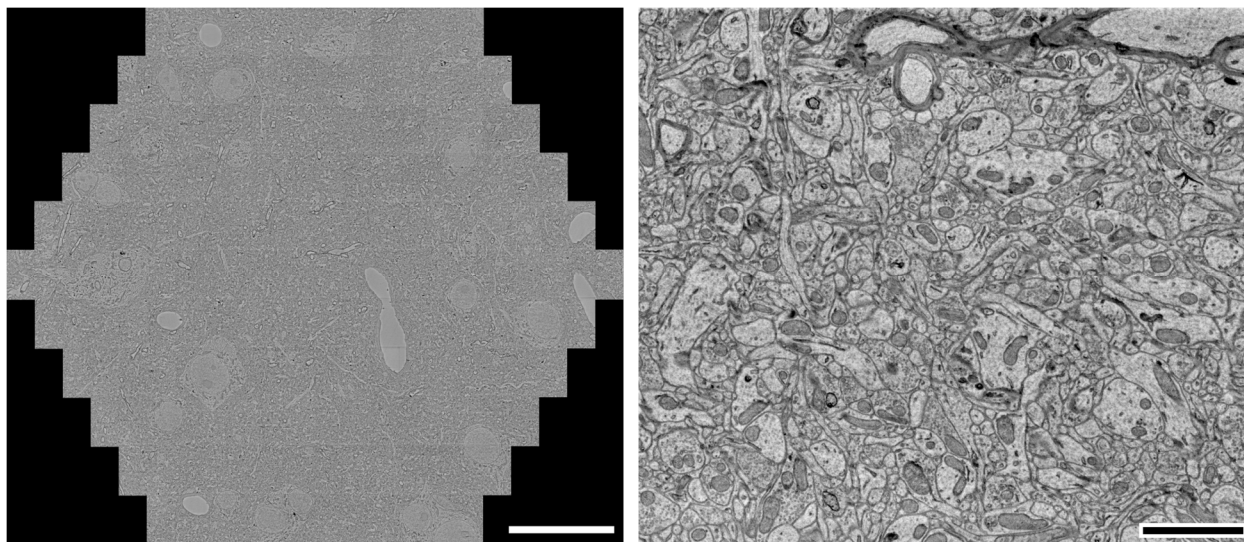

295  
296 *Figure S5 Multibeam (91) Scanning EM of magnetically collected sections on silicon wafer. Left, Overview of 91 stitched tiles.*  
297 *Right, a tile produced by one of the 91 beams. Imaging conditions: silicon wafer chip glued to EM stub with carbon glue, 4 nm*  
298 *pixel size, 400 ns dwell time, Scale bars: left, 20  $\mu\text{m}$ ; right: 2  $\mu\text{m}$*

299  
300  
301  
302  
303  
304  
305  
306  
307  
308  
309  
310  
311  
312  
313  
314



315

I. Labeled neurite

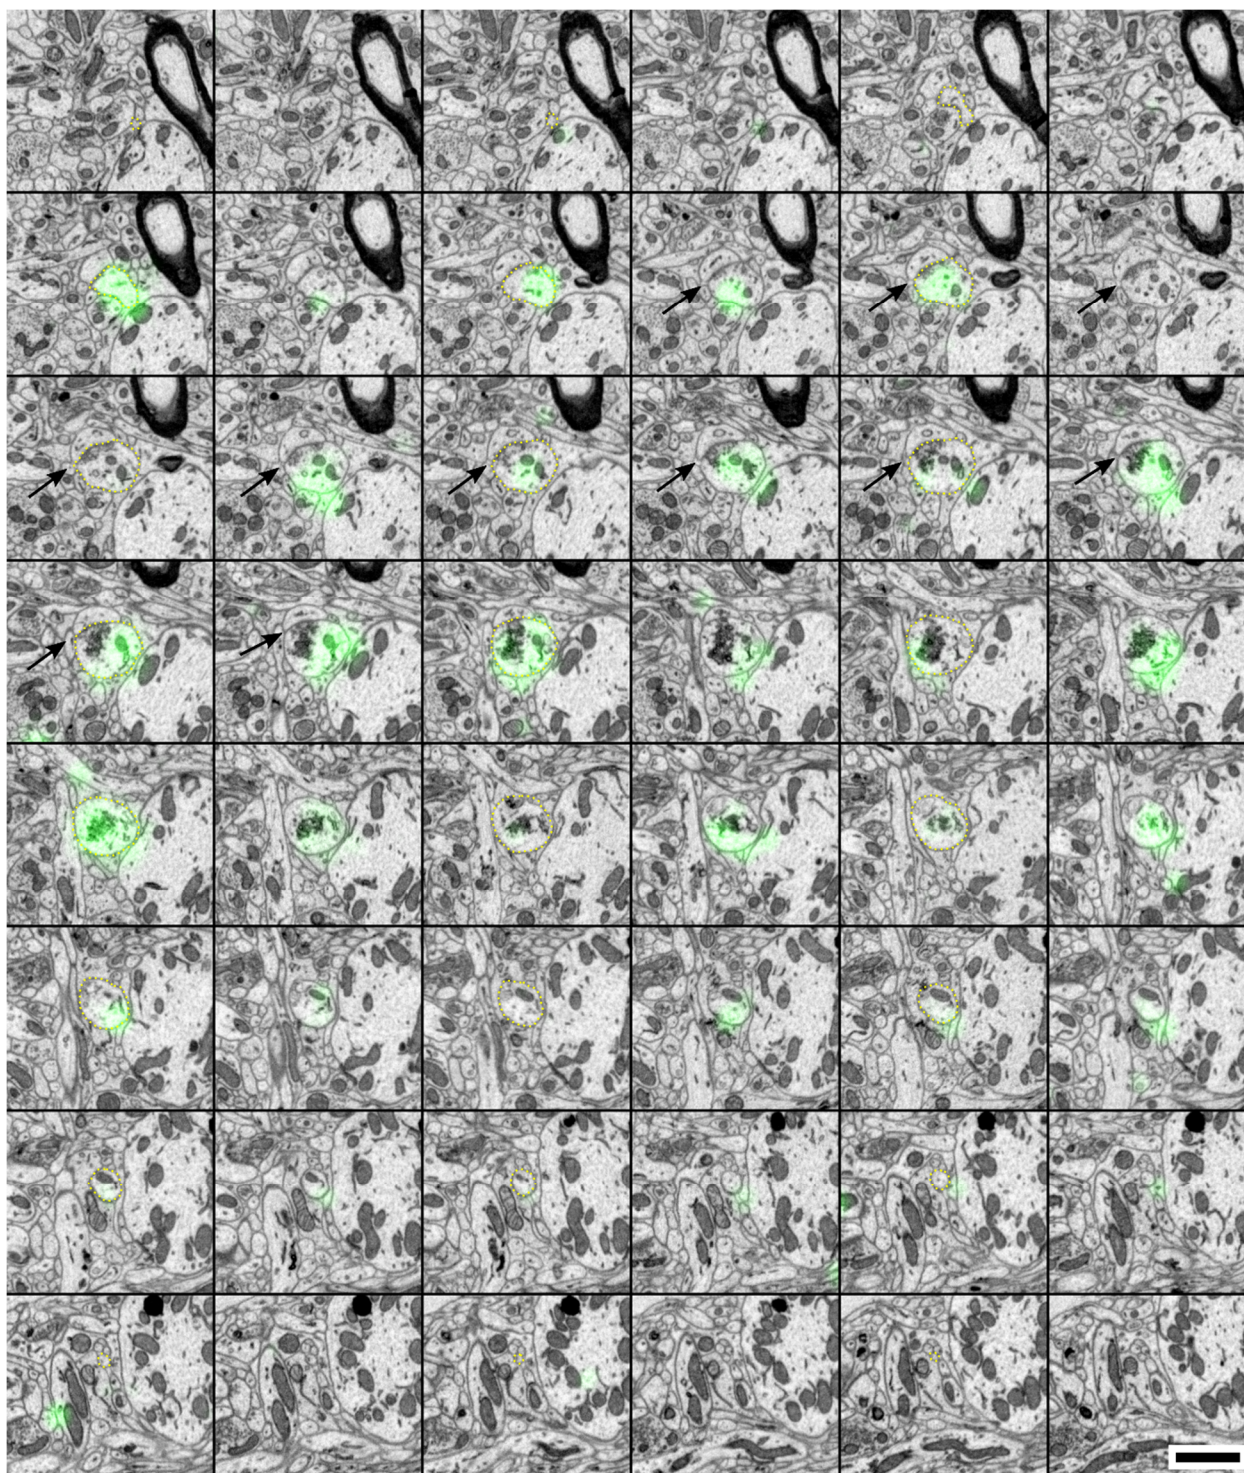

316

317 *Figure S6* Labeled axon makes a synapse en passant. The axon is delineated with dashed yellow lines (every second section).  
318 Black arrows indicate the synapse. Scale bar 1 micron.

319

320

J. Cross-modality registration

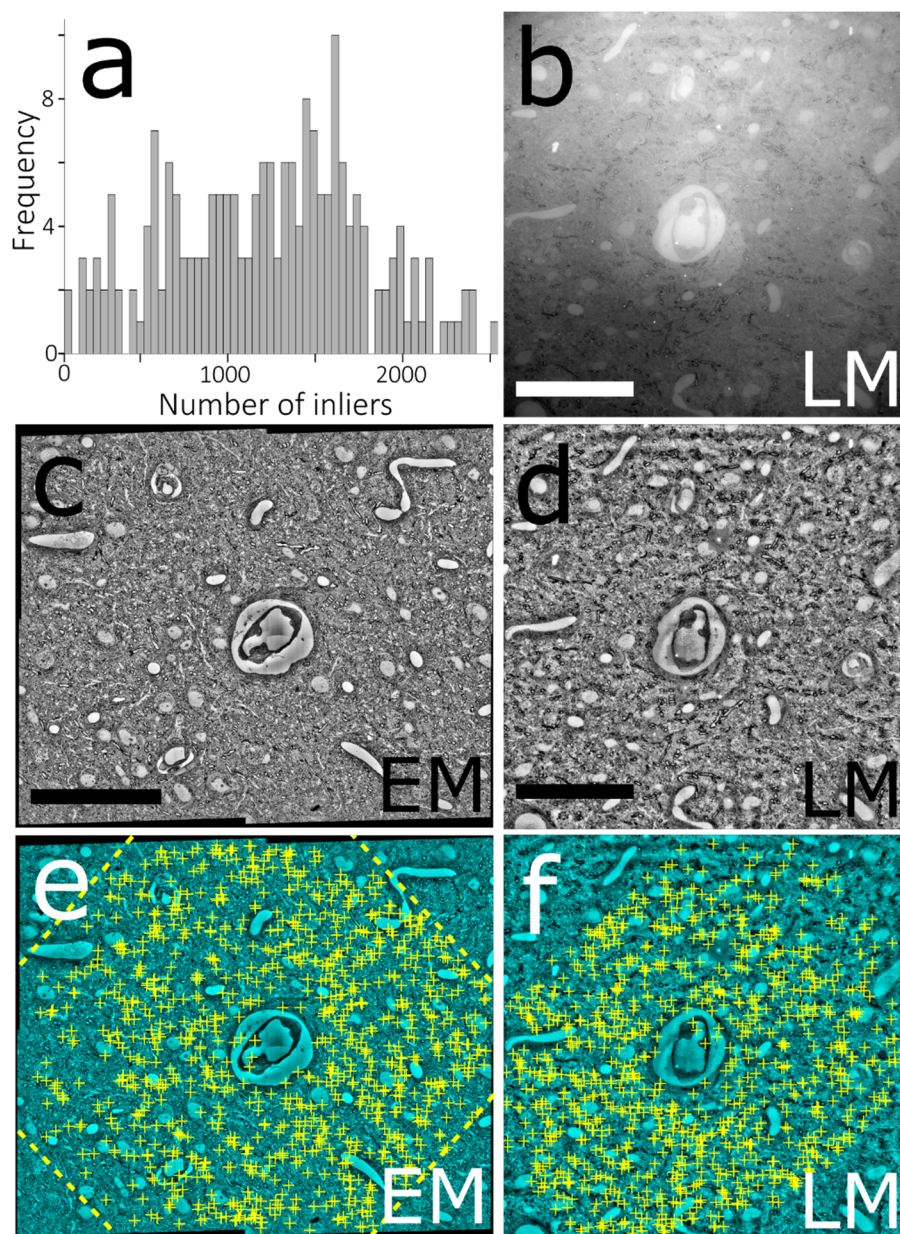

321

322 **Figure S7 Automated LM-EM registration.** a, Histogram of number of matching inliers found for each of the 203 LM-EM pairs of  
323 data set 2. b, A reflection brightfield light micrograph after simple thresholding. c, downscaled EM mosaic. d, Same micrograph  
324 as in a after local contrast normalization. Note the high similarity with its EM counterpart micrograph in c. e, f: Same  
325 micrographs as in c, d, respectively. The yellow crosses show the location of matching SIFT features between the two images.  
326 The dashed yellow lines in e show the outline of LM micrograph when affine transformed to match its EM counterpart. Scale  
327 bars: 50  $\mu$ m

328

329

330

331 K. Video 1: flythrough in EM imagery of data set 2

332 Video available here: <https://youtu.be/VL0F9DkZVaQ>

333 L. Video 2: zoom on wafer of data set 2

334 Video available here: <https://youtu.be/23DWA8YbGH4>

335 M. Visualization of correlative LM-EM stack in neuroglancer

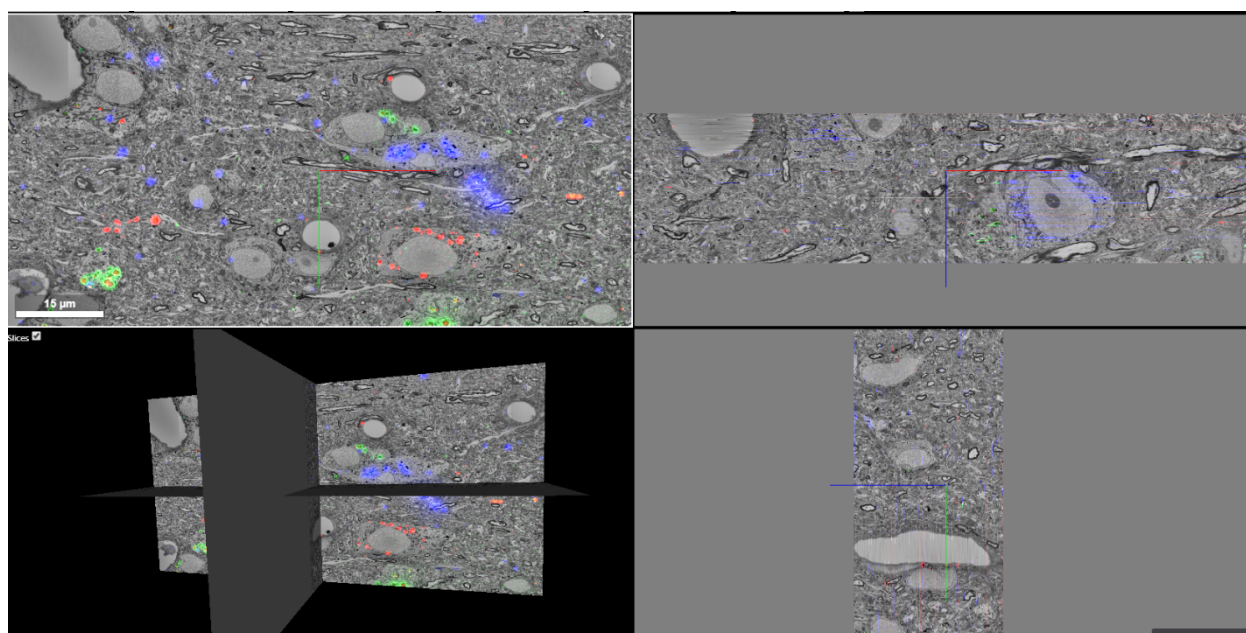

336

337 **Figure S8** Multicolor correlative LM-EM imagery (data set 1) of zebra finch HVC nucleus showing 3 neuroanatomical tracers  
338 injected in Area X (blue), the nucleus Robustus of the Arcopallium (green), and Avalanche (red). The two panes on the right  
339 show x and y reslices through the volume.

340 N. Text 1: conversion of correlative LM-EM imagery for neuroglancer

341 EM imagery assembled in TrakEM2 along with all transforms (affine, elastic and moving least squares)  
342 was converted into a Render<sup>3</sup> project<sup>26</sup> with custom scripts and the TrakEM2 converter script of the  
343 Render project. Similarly, TrakEM2 projects were created for each LM channel that contained stitching  
344 and moving least square transforms. These TrakEM2 projects were converted to separate Render  
345 projects. The imagery of the EM and LM Render projects was rendered to files using a custom script and  
346 the Render script for mipmap creation (render\_catmaid\_boxes). With a custom script, these mipmaps  
347 were then used to create chunks at different resolutions in the “precomputed format” of Neuroglancer<sup>4</sup>.  
348 The chunks were uploaded to an online cloud storage service (Google storage) and an instance of the  
349 Neuroglancer software hosted online (neurodataviz from the MICrONS project) was used to visualize the  
350 data. The EM imagery and each fluorescent LM channel were added into a neuroglancer session as  
351 separate data sources. After online visualization with neuroglancer, stacks of correlative imagery were

<sup>3</sup> <https://github.com/saalfeldlab/render>

<sup>4</sup> <https://github.com/google/neuroglancer>

352 fetched using the cloud-volume library<sup>5</sup>. Neurite tracings were performed in neuroglancer (line  
353 annotations).

354 O. Traced neurites

355 The 9 traced neurites in data set 2 are available online at this link (copy-paste in browser address):

---

<sup>5</sup> <https://github.com/seung-lab/cloud-volume>
